# Supplementary material for: Characterization of Nonphysician Health Care Workers’ Burnout and Subsequent Changes in Work Effort
Source: PubMed Central journal article supplement (PMC8379653; doi:10.1001/jamanetworkopen.2021.21435), 2021-08-20
Supplement: jamanetwopen-e2121435-s001.pdf [file jamanetwopen-e2121435-s001.pdf]

## Supplemental Online Content

Dyrbye LN, Major-Elechi B, Thapa P, et al. Characterization of nonphysician health care workers' burnout and subsequent changes in work effort. *JAMA Netw Open*. 2021;4(8):e2121435. doi:10.1001/jamanetworkopen.2021.21435

**eTable 1.** Comparison of Participating and Nonparticipating Health Care Workers

**eTable 2.** Emotional Exhaustion or Depersonalization at Baseline and Subsequent Reduction in Work Effort

**eTable 3.** Satisfaction at Baseline and Subsequent Reduction in Work Effort

This supplemental material has been provided by the authors to give readers additional information about their work.

**eTable 1.** Comparison of Participating and Nonparticipating Health Care Workers

| <b>2015 Survey</b>              | <b>Non-responder<br/>(N=4963)</b> | <b>Responder<br/>(N=26292)</b> | <b>p value</b> |
|---------------------------------|-----------------------------------|--------------------------------|----------------|
| <b>Age</b>                      |                                   |                                | <0.001         |
| <35                             | 1652 (33.3%)                      | 6678 (25.4%)                   |                |
| 35-44                           | 1262 (25.4%)                      | 6541 (24.9%)                   |                |
| 45-54                           | 1150 (23.2%)                      | 7298 (27.8%)                   |                |
| 55-64                           | 813 (16.4%)                       | 5451 (20.7%)                   |                |
| ≥65                             | 86 (1.7%)                         | 323 (1.2%)                     |                |
| Missing                         | 0                                 | 1                              |                |
|                                 |                                   |                                |                |
| <b>Length of Service</b>        |                                   |                                | <0.001         |
| ≤5 years                        | 1718 (34.6%)                      | 8574 (32.6%)                   |                |
| 6-10 years                      | 1052 (21.2%)                      | 5327 (20.3%)                   |                |
| 11-15 years                     | 856 (17.2%)                       | 4273 (16.3%)                   |                |
| >15 years                       | 1337 (26.9%)                      | 8117 (30.9%)                   |                |
| Missing                         | 0                                 | 1                              |                |
|                                 |                                   |                                |                |
| <b>Gender</b>                   |                                   |                                | 0.635          |
| Female                          | 3810 (76.8%)                      | 20265 (77.1%)                  |                |
| Male                            | 1153 (23.2%)                      | 6027 (22.9%)                   |                |
|                                 |                                   |                                |                |
| <b>Job Category</b>             |                                   |                                | <0.001         |
| Nurses                          | 1833 (36.9%)                      | 6595 (25.1%)                   |                |
| Admin Office Support            | 315 (6.3%)                        | 2971 (11.3%)                   |                |
| Business Professionals          | 268 (5.4%)                        | 4953 (18.8%)                   |                |
| Clinical Office Support         | 463 (9.3%)                        | 2884 (11.0%)                   |                |
| Healthcare Professional         | 351 (7.1%)                        | 2423 (9.2%)                    |                |
| Service/Support Personnel       | 1025 (20.7%)                      | 2968 (11.3%)                   |                |
| Technician/Technologist         | 708 (14.3%)                       | 3498 (13.3%)                   |                |
|                                 |                                   |                                |                |
| <b>Assigned FTE<sup>1</sup></b> |                                   |                                | <0.001         |
| < .01                           | 299 (6.0%)                        | 364 (1.4%)                     |                |
| .01 - .49                       | 52 (1.0%)                         | 89 (0.3%)                      |                |
| .50 - .74                       | 707 (14.2%)                       | 1717 (6.5%)                    |                |

|                                 |                                   |                                |                |
|---------------------------------|-----------------------------------|--------------------------------|----------------|
| .75 - .99                       | 1865 (37.6%)                      | 6484 (24.7%)                   |                |
| 1                               | 2040 (41.1%)                      | 17638 (67.1%)                  |                |
|                                 |                                   |                                |                |
| <b>2017 Survey</b>              | <b>Non-responder<br/>(N=4855)</b> | <b>Responder<br/>(N=26303)</b> | <b>p value</b> |
| <b>Age</b>                      |                                   |                                | <0.001         |
| <35                             | 1324 (27.3%)                      | 5201 (19.8%)                   |                |
| 35-44                           | 1314 (27.1%)                      | 6661 (25.3%)                   |                |
| 45-54                           | 1132 (23.3%)                      | 6926 (26.3%)                   |                |
| 55-64                           | 946 (19.5%)                       | 6796 (25.8%)                   |                |
| >=65                            | 139 (2.9%)                        | 719 (2.7%)                     |                |
|                                 |                                   |                                |                |
| <b>Length of Service</b>        |                                   |                                | <0.001         |
| <=5 years                       | 1290 (26.6%)                      | 6280 (23.9%)                   |                |
| 6-10 years                      | 1019 (21.0%)                      | 5391 (20.5%)                   |                |
| 11-15 years                     | 887 (18.3%)                       | 4622 (17.6%)                   |                |
| >15 years                       | 1659 (34.2%)                      | 10010 (38.1%)                  |                |
|                                 |                                   |                                |                |
| <b>Gender</b>                   |                                   |                                | 0.259          |
| Female                          | 3705 (76.3%)                      | 20268 (77.1%)                  |                |
| Male                            | 1150 (23.7%)                      | 6035 (22.9%)                   |                |
|                                 |                                   |                                |                |
| <b>Job Category</b>             |                                   |                                | <0.001         |
| Nurses                          | 1591 (32.8%)                      | 5884 (22.4%)                   |                |
| Admin Office Support            | 310 (6.4%)                        | 2889 (11.0%)                   |                |
| Business Professionals          | 288 (5.9%)                        | 5309 (20.2%)                   |                |
| Clinical Office Support         | 454 (9.4%)                        | 2826 (10.7%)                   |                |
| Healthcare Professional         | 631 (13.0%)                       | 3229 (12.3%)                   |                |
| Service/Support Personnel       | 892 (18.4%)                       | 2656 (10.1%)                   |                |
| Technician/Technologist         | 689 (14.2%)                       | 3510 (13.3%)                   |                |
|                                 |                                   |                                |                |
| <b>Assigned FTE<sup>1</sup></b> |                                   |                                | <0.001         |
| < .01                           | 328 (6.8%)                        | 302 (1.1%)                     |                |
| .01 - .49                       | 48 (1.0%)                         | 59 (0.2%)                      |                |
| .50 - .74                       | 653 (13.5%)                       | 1729 (6.6%)                    |                |

|           |              |               |  |
|-----------|--------------|---------------|--|
| .75 - .99 | 1801 (37.1%) | 6595 (25.1%)  |  |
| 1         | 2025 (41.7%) | 17618 (67.0%) |  |

<sup>1</sup> Employment status policy defines those as authorized to work 40 hours per week to be full-time (1 FTE). Those authorized to work 20-39 hours per week are classified as 0.75 to 0.99 FTE. Individuals authorized to work a regular schedule but less than 20 hours per week or 40 hours per pay period are classified as .01-.49 FTE and are part-time. Supplemental staff work a minimum of 96 hours per payroll year based on staffing needs.

**eTable 2.** Emotional Exhaustion or Depersonalization at Baseline and Subsequent Reduction in Work Effort

| Variable                         | Level                                 | Odds Ratio (95% CI) | p-value | Overall p-value |
|----------------------------------|---------------------------------------|---------------------|---------|-----------------|
| <b>Emotional Exhaustion</b>      |                                       |                     |         |                 |
| Emotional Exhaustion at baseline | For every one point increase in score | 1.12 (1.10-1.16)    |         | <.001           |
| Gender                           | Male vs. Female                       | 0.47 (0.40-0.54)    |         | <.001           |
| Age                              | <35                                   | Reference           |         | <.001           |
|                                  | 35-44                                 | 0.59 (0.51-0.67)    | <.001   |                 |
|                                  | 45-54                                 | 0.50 (0.42-0.58)    | <.001   |                 |
|                                  | 55-64                                 | 0.69 (0.59-0.82)    | <.001   |                 |
|                                  | >=65                                  | 1.54 (1.03-2.29)    | .03     |                 |
| Duration of employment           | ≤5 years                              | Reference           |         | <.001           |
|                                  | 6-10 years                            | 0.87 (0.77-0.99)    | .04     |                 |
|                                  | 11-15 years                           | 0.76 (0.65-0.90)    | .001    |                 |
|                                  | >15 years                             | 0.74 (0.64-0.86)    | <.001   |                 |
| Position                         | Nurses                                | Reference           |         | <.001           |
|                                  | Admin Office Support                  | 0.17 (0.14-0.22)    | <.001   |                 |
|                                  | Business Professionals                | 0.09 (0.07-0.12)    | <.001   |                 |
|                                  | Clinical Office Support               | 0.25 (0.21-0.30)    | <.001   |                 |
|                                  | Healthcare Professional               | 0.39 (0.33-0.47)    | <.001   |                 |
|                                  | Service/Support Personnel             | 0.55 (0.48-0.64)    | <.001   |                 |
|                                  | Technician/Technologist               | 0.35 (0.30-0.41)    | <.001   |                 |
| Baseline FTE                     | For every .10 increase                | 1.17 (1.13-1.21)    |         | <.001           |
| <b>Depersonalization</b>         |                                       |                     |         |                 |

| <b>Variable</b>               | <b>Level</b>                          | <b>Odds Ratio (95% CI)</b> | <b>p-value</b> | <b>Overall p-value</b> |
|-------------------------------|---------------------------------------|----------------------------|----------------|------------------------|
| Depersonalization at baseline | For every one point increase in score | 1.10 (1.06-1.14)           |                | <.001                  |
| Gender                        | Male vs. Female                       | 0.46 (0.39-0.53)           |                | <.001                  |
| Age                           | <35                                   | Reference                  |                | <.001                  |
|                               | 35-44                                 | 0.58 (0.50-0.66)           | <.001          |                        |
|                               | 45-54                                 | 0.48 (0.41-0.56)           | <.001          |                        |
|                               | 55-64                                 | 0.68 (0.58-0.80)           | <.001          |                        |
|                               | >=65                                  | 1.54 (1.04-2.29)           | .03            |                        |
| Duration of Employment        | ≤ 5 years                             | Reference                  |                | <.001                  |
|                               | 6-10 years                            | 0.88 (0.77-1.00)           | .05            |                        |
|                               | 11-15 years                           | 0.77 (0.65-0.90)           | .001           |                        |
|                               | >15 years                             | 0.75 (0.65-0.88)           | <.001          |                        |
| Position                      | Nurses                                | Reference                  |                | <.001                  |
|                               | Admin Office Support                  | 0.18 (0.14-0.22)           | <.001          |                        |
|                               | Business Professionals                | 0.09 (0.07-0.12)           | <.001          |                        |
|                               | Clinical Office Support               | 0.25 (0.21-0.30)           | <.001          |                        |
|                               | Healthcare Professional               | 0.40 (0.33-0.47)           | <.001          |                        |
|                               | Service/Support Personnel             | 0.55 (0.48-0.64)           | <.001          |                        |
|                               | Technician/Technologist               | 0.35 (0.30-0.41)           | <.001          |                        |
| Baseline FTE                  | For every .10 increase                | 1.18 (1.13-1.22)           |                | <.001                  |

**eTable 3.** Satisfaction at Baseline and Subsequent Reduction in Work Effort

| <b>Variable</b>          | <b>Level</b>                          | <b>Odds Ratio (95% CI)</b> | <b>p-value</b> | <b>Overall p-value</b> |
|--------------------------|---------------------------------------|----------------------------|----------------|------------------------|
| Satisfaction at baseline | For every one point increase in score | 0.83 (0.79-0.88)           |                | <.001                  |
| Gender                   | Male vs. Female                       | 0.46 (0.39-0.53)           |                | <.001                  |
| Age                      | <35                                   | Reference                  |                | <.001                  |
|                          | 35-44                                 | 0.57 (0.49-0.65)           | <.001          |                        |
|                          | 45-54                                 | 0.46 (0.40-0.54)           | <.001          |                        |
|                          | 55-64                                 | 0.64 (0.54-0.74)           | <.001          |                        |
|                          | >=65                                  | 1.44 (0.97-2.12)           | .07            |                        |
| Duration of Employment   | ≤ 5 years                             | Reference                  |                | .003                   |
|                          | 6-10 years                            | 0.88 (0.78-1.01)           | .06            |                        |
|                          | 11-15 years                           | 0.76 (0.65-0.90)           | <.001          |                        |
|                          | >15 years                             | 0.75 (0.65-0.88)           | <.001          |                        |
| Position                 | Nurses                                | Reference                  |                | <.001                  |
|                          | Admin Office Support                  | 0.17 (0.14-0.21)           | <.001          |                        |
|                          | Business Professionals                | 0.09 (0.07-0.12)           | <.001          |                        |
|                          | Clinical Office Support               | 0.25 (0.20-0.3)            | <.001          |                        |
|                          | Healthcare Professional               | 0.39 (0.33-0.47)           | <.001          |                        |
|                          | Service/Support Personnel             | 0.54 (0.47-0.63)           | <.001          |                        |
|                          | Technician/Technologist               | 0.34 (0.29-0.40)           | <.001          |                        |
| Baseline FTE             | For every .10 increase                | 1.18 (1.14-1.22)           |                | <.001                  |
